# Supplementary material for: Identification of a histone family gene signature for predicting the prognosis of cervical cancer patients
Source: PubMed Central journal article supplement (PMC5705706; doi:10.1038/s41598-017-16472-5), 2017-11-28
Supplement: 41598_2017_16472_MOESM1_ESM.pdf [file 41598_2017_16472_MOESM1_ESM.pdf]

## Supplementary Material

### **Identification of a histone family gene signature for predicting the prognosis of cervical cancer patients**

Xiaofang Li<sup>1#</sup>, Run Tian<sup>2#</sup>, Hugh Gao<sup>3</sup>, Yongkang Yang<sup>1</sup>, Bryan RG Williams<sup>3</sup>, Michael P. Gantier<sup>3</sup>, Nigel A.J. McMillan<sup>4</sup>, Dakang Xu<sup>3,5</sup>, Yiqun Hu<sup>5\*</sup> and Yan'e Gao<sup>1\*</sup>

<sup>1</sup>Department of Obstetrics and Gynecology, the Second Affiliated Hospital, Xi'an Jiaotong University, Xi'an, P. R. China

**Corresponding Author:** Tel. +86 29 87679558; E-mail: drgao1991@hotmail.com

**Table S1 Information of the data resources**

| Groups                                        | Cervix Uteri<br>(number of samples) | Cervical Carcinoma<br>(number of samples) | Experiment type   |
|-----------------------------------------------|-------------------------------------|-------------------------------------------|-------------------|
| TCGA<br>(TCGA-CESC) #                         | 3                                   | 252                                       | RNA-sequencing    |
| Biewenga Cervix<br>(GSE7410) <sup>1*</sup>    | 5                                   | 40                                        | Micro array(mRNA) |
| Pyeon Multi-cancer<br>(GSE6791) <sup>2*</sup> | 8                                   | 20                                        | Micro array(mRNA) |
| Scotto Cervix<br>(GSE9750) <sup>3*</sup>      | 3                                   | 32                                        | Micro array(mRNA) |

Abbreviations: TCGA: The Cancer Genome Atlas

#TCGA-CESC: project ID of the data we used from TCGA

\*The three datasets we used for validation also can be searched in GEO(Gene Expression Omnibus microarray data repository), GEO accessions and references were shown.

**References:**

- 1 Biewenga, P. *et al.* Gene expression in early stage cervical cancer. *Gynecologic Oncology* **108**, 520-526, doi:10.1016/j.ygyno.2007.11.024.
- 2 Pyeon, D. *et al.* Fundamental differences in cell cycle deregulation in human papillomavirus-positive and human papillomavirus-negative head/neck and cervical cancers. *Cancer research* **67**, 4605-4619, doi:10.1158/0008-5472.CAN-06-3619 (2007).
- 3 Scotto, L. *et al.* Identification of copy number gain and overexpressed genes on chromosome arm 20q by an integrative genomic approach in cervical cancer: Potential role in progression. *Genes, Chromosomes and Cancer* **47**, 755-765, doi:10.1002/gcc.20577 (2008).

**Table S2 Information of the DEGs corresponding to the heatmap (Figure 2)**

|                               | logFC           | logCPM          | P-Value         | FDR             |
|-------------------------------|-----------------|-----------------|-----------------|-----------------|
| <b>Up-DEGs</b>                |                 |                 |                 |                 |
| <b>(cancer versus normal)</b> |                 |                 |                 |                 |
| FAM83C                        | 11.00726        | 4.921006        | 0.001449        | 0.012618        |
| UGT1A6                        | 10.5887         | 1.75696         | 0.007979        | 0.048456        |
| EPGN                          | 10.43008        | 1.599564        | 0.008235        | 0.04946         |
| NANOGNBP3                     | 10.208962       | 1.85087         | 0.000772        | 0.007596        |
| TERT                          | 10.04358        | 1.217666        | 3.68E-05        | 0.000559        |
| MAB21L3                       | 9.786823        | 0.9653          | 0.000204        | 0.002506        |
| RP11-21B23.2                  | 9.699783        | 0.87928         | 0.008012        | 0.048596        |
| KRT3                          | 9.606661        | 0.788798        | 0.008165        | 0.049208        |
| KRT16P1                       | 9.605554        | 0.786461        | 0.00532         | 0.035572        |
| CALML5                        | 9.491751        | 7.428736        | 0.00544         | 0.036201        |
| PLA2G4E                       | 9.480202        | 4.407806        | 0.003248        | 0.024052        |
| <b>HIST1H2BL</b>              | <b>9.372446</b> | <b>3.376436</b> | <b>0.006084</b> | <b>0.039312</b> |
| IGF2BP1                       | 9.302071        | 3.031891        | 0.007071        | 0.044205        |
| PGLYRP3                       | 9.283234        | 3.376436        | 0.006084        | 0.039312        |
| CH17-360D5.3                  | 9.093475        | 2.292376        | 0.000504        | 0.005383        |
| <b>HIST1H2BJ</b>              | <b>9.020184</b> | <b>3.250386</b> | <b>0.001613</b> | <b>0.013761</b> |
| OR2B6                         | 9.008599        | 0.204147        | 3.27E-05        | 0.000503        |
| <b>HIST1H2BM</b>              | <b>9.004763</b> | <b>2.004825</b> | <b>2.64E-05</b> | <b>0.000418</b> |
| CYP4F23P                      | 8.943169        | 0.140711        | 0.007992        | 0.048505        |
| RP11-161I6.2                  | 8.844568        | 0.045341        | 0.001989        | 0.01626         |
| <b>HIST1H2AI</b>              | <b>8.832465</b> | <b>0.033357</b> | <b>1.11E-06</b> | <b>2.34E-05</b> |
| ZIC2                          | 8.736181        | 4.075299        | 3.05E-05        | 0.000474        |
| <b>HIST1H2BD</b>              | <b>8.663077</b> | <b>4.532132</b> | <b>0.001339</b> | <b>0.011848</b> |
| TPSP2                         | 8.661043        | -0.13167        | 0.005447        | 0.036211        |
| RP11-1038A11.3                | 8.606365        | -0.18447        | 0.00276         | 0.02112         |
| <b>Down-DEGs</b>              |                 |                 |                 |                 |
| <b>(cancer versus normal)</b> |                 |                 |                 |                 |
| PGM5-AS1                      | -9.16467        | -1.34416        | 1.62E-88        | 5.21E-84        |
| TCEAL6                        | -8.61211        | -2.44778        | 7.55E-83        | 8.08E-79        |
| FRMD6-AS2                     | -7.97443        | -2.01225        | 3.94E-49        | 3.42E-46        |
| TCF23                         | -7.95359        | 0.658118        | 9.46E-41        | 4.22E-38        |
| RP11-475A13.1                 | -7.91355        | -4.14075        | 3.47E-45        | 1.96E-42        |
| RP3-333A15.2                  | -7.86555        | -3.21927        | 8.93E-63        | 1.91E-59        |
| AGTR2                         | -7.7095         | -1.16863        | 5.24E-17        | 4.05E-15        |
| DES                           | -7.58321        | 6.095272        | 1.18E-56        | 1.57E-53        |
| CNN1                          | -7.52521        | 5.393158        | 7.45E-77        | 5.98E-73        |
| ACTG2                         | -7.35287        | 5.862155        | 2.33E-56        | 3.00E-53        |
| PTGER3                        | -7.2886         | 1.997712        | 2.51E-74        | 1.61E-70        |
| DPP6                          | -7.21308        | 1.150937        | 7.32E-42        | 3.46E-39        |
| RP11-887P2.5                  | -7.17872        | -1.53145        | 1.71E-46        | 1.10E-43        |

---

|             |          |          |          |          |
|-------------|----------|----------|----------|----------|
| AC053503.12 | -7.12269 | -3.22431 | 3.51E-27 | 7.38E-25 |
| CHRD1       | -7.09942 | 2.029395 | 9.46E-34 | 2.87E-31 |
| CLVS2       | -7.08581 | -2.73499 | 6.39E-28 | 1.40E-25 |
| PI16        | -7.07756 | 2.014868 | 4.14E-37 | 1.44E-34 |
| GPM6A       | -6.9051  | -0.55645 | 4.90E-45 | 2.70E-42 |
| AC053503.6  | -6.90042 | -3.74084 | 1.05E-23 | 1.61E-21 |
| MYH11       | -6.89444 | 6.838917 | 1.02E-56 | 1.48E-53 |
| SERTM1      | -6.84045 | 0.87733  | 9.81E-16 | 6.44E-14 |
| ANGPTL1     | -6.80391 | 0.742043 | 5.09E-50 | 4.96E-47 |
| PLN         | -6.71017 | 1.648954 | 8.63E-51 | 8.66E-48 |
| PRLHR       | -6.69165 | -2.98097 | 3.67E-17 | 2.91E-15 |
| LCN6        | -6.67999 | -2.36527 | 1.63E-45 | 9.52E-43 |

---

**Table S3 Up-regulated KEGG pathways**

| ID       | Description                  | Gene Ratio | P-value | Q-value | Gene ID                                                                                                                                                                                                                                                                                                        |
|----------|------------------------------|------------|---------|---------|----------------------------------------------------------------------------------------------------------------------------------------------------------------------------------------------------------------------------------------------------------------------------------------------------------------|
| hsa04110 | Cell cycle                   | 35/368     | 0.0000  | 0.0000  | BUB1/BUB1B/CCNA2/CCNB1/CCNB2/CCNE1/CCNE2/CDC20/CDC25A/CDC25C/CDC45/CDC6/CDC7/CDK1/CDKN2A/CDKN2B/CHEK1/E2F1/E2F2/ESPL1/MAD2L1/MCM2/MCM4/MCM5/ORC1/ORC6/PCNA/PKMYT1/PLK1/PTTG1/RBL1/SFN/SKP2/SMC1B/TTK                                                                                                           |
| hsa05322 | Systemic lupus erythematosus | 28/368     | 0.0000  | 0.0000  | HIST1H2AD/HIST1H2AG/HIST1H2AI/HIST1H2AJ/HIST1H2AL/HIST1H2AM/HIST1H2BC/HIST1H2BD/HIST1H2BF/HIST1H2BG/HIST1H2BH/HIST1H2BI/HIST1H2BJ/HIST1H2BL/HIST1H2BO/HIST1H3B/HIST1H3C/HIST1H3D/HIST1H3F/HIST1H3G/HIST1H3H/HIST1H3J/HIST1H4D/HIST1H4E/HIST2H2AB/HIST2H2BF/HIST2H4A/HIST3H2BB                                  |
| hsa05034 | Alcoholism                   | 33/368     | 0.0000  | 0.0000  | CALML3/CALML5/GNGT1/GRIN1/GRIN2D/HIST1H2AD/HIST1H2AG/HIST1H2AI/HIST1H2AJ/HIST1H2AL/HIST1H2AM/HIST1H2BC/HIST1H2BD/HIST1H2BF/HIST1H2BG/HIST1H2BH/HIST1H2BI/HIST1H2BJ/HIST1H2BL/HIST1H2BO/HIST1H3B/HIST1H3C/HIST1H3D/HIST1H3F/HIST1H3G/HIST1H3H/HIST1H3J/HIST1H4D/HIST1H4E/HIST2H2AB/HIST2H2BF/HIST2H4A/HIST3H2BB |
| hsa03030 | DNA replication              | 12/368     | 0.0000  | 0.0000  | DNA2/FEN1/LIG1/MCM2/MCM4/MCM5/PCNA/POLD1/POLE/POLE2/RFC4/RNASEH2A                                                                                                                                                                                                                                              |
| hsa05203 | Viral carcinogenesis         | 30/368     | 0.0000  | 0.0000  | ATP6V0D2/BAK1/CCNA2/CCNE1/CCNE2/CCR8/CDC20/CDK1/CDKN2A/CDKN2B/CHEK1/HIST1H2BC/HIST1H2BD/HIST1H2BF/HIST1H2BG/HIST1H2BH/HIST1H2BI/HIST1H2BJ/HIST1H2BL/HIST1H2BO/HIST1H4D/HIST1H4E/HIST2H2BF/HIST2H4A/HIST3H2BB/IRF7/PMAIP1/RBL1/SKP2/SYK                                                                         |
| hsa04115 | p53 signaling                | 16/368     | 0.0000  | 0.0000  | CCNB1/CCNB2/CCNE1/CCNE2/CD8                                                                                                                                                                                                                                                                                    |

|          |                          |        |        |        |                                                                                                                                      |
|----------|--------------------------|--------|--------|--------|--------------------------------------------------------------------------------------------------------------------------------------|
|          | pathway                  |        |        |        | 2/CDK1/CDKN2A/CHEK1/GTSE1/PEP/MAIP1/RRM2/SERPIN5/SFN/TP53AIP1/TP73                                                                   |
| hsa03460 | Fanconi anemia pathway   | 14/368 | 0.0000 | 0.0000 | BLM/BRCA1/BRCA2/BRIP1/EME1/FAAP24/FANCA/FANCB/FANCD2/FANCI/RAD51/RMI1/RMI2/UBE2T/AURKA/BUB1/CALML3/CALML5/CCNB1/CCNB2/CCNE1/CCNE2/CD |
| hsa04114 | Oocyte meiosis           | 21/368 | 0.0000 | 0.0000 | C20/CDC25C/CDK1/ESPL1/FBXO43/ITPR3/MAD2L1/PKMYT1/PLK1/PTTG1/RPS6KA1/SGOL1/SMC1B                                                      |
| hsa03440 | Homologous recombination | 11/368 | 0.0000 | 0.0001 | BLM/BRCA1/BRCA2/BRIP1/EME1/POLD1/RAD51/RAD54B/RAD54L/TOPBP1/XRCC2                                                                    |
| hsa04530 | Tight junction           | 19/368 | 0.0010 | 0.0253 | CGN/CLDN14/CLDN4/CLDN7/CRB3/EPB41L4B/F11R/LLGL2/MARVELD2/MARVELD3/MICALL2/MYH14/OCLN/PCNA/PRKCZ/RUNX1/SLC9A3R1/TUBA1C/TUBA4A         |
| hsa03410 | Base excision repair     | 7/368  | 0.0012 | 0.0258 | FEN1/LIG1/NEIL3/PCNA/POLD1/POLE/POLE2                                                                                                |

**Table S4 Down-regulated KEGG pathways**

| ID       | Description                                | Gene Ratio | P-value | Q-value | Gene ID                                                                                                                                                                                                                                                                                                                   |
|----------|--------------------------------------------|------------|---------|---------|---------------------------------------------------------------------------------------------------------------------------------------------------------------------------------------------------------------------------------------------------------------------------------------------------------------------------|
| hsa04510 | Focal adhesion                             | 43/466     | 0.0000  | 0.0000  | AKT3/BCL2/CAV1/CHAD/COL1A2/COL4A6/COL6A1/COL6A2/COL6A3/COL6A6/FLNA/FLNC/FLT1/FLT4/FYN/HGF/LK/ITGA11/ITGA7/ITGA8/ITGA9/ITGB3/KDR/LAMA2/LAMA4/LAMB2/MAPK10/MYL9/MYLK/PARVA/PDGFC/PDGF D/PDGFRA/PDGFRB/PPP1R12B/PRKCA/RELN/THBS1/THBS4/TNXB/FIGF/VWF/ZYX                                                                     |
| hsa04270 | Vascular smooth muscle contraction         | 31/466     | 0.0000  | 0.0000  | ACTA2/ACTG2/ADCY4/ADCY5/ADRA1A/ADRA1D/AGTR1/AVPR1A/CACNA1C/CALCRL/CALD1/EDNRA/GUCY1A2/ITPR1/KCNMA1/KCNMB1/KCNMB2/MRV11/MYH11/MYL9/MYLK/NPR1/NPR2/PLA2G5/PPP1R12B/PPP1R14A/PRKCA/PRKG1/RAMP1/RAMP2/RAMP3/ADCYAP1R1/ADRA1A/ADRA1D/ADRA2A/ADRA2C/ADRB3/AGTR1/AGTR2/AVPR1A/AVPR2/BRS3/CALCRL/CHRM2/CTSG/EDNRA/EDNRB/GH1/GLP2R |
| hsa04080 | Neuroactive ligand-receptor or interaction | 50/466     | 0.0000  | 0.0000  | /GRIA2/GRIA3/GRID1/GRIK5/GRM7/HTR1E/HTR2A/HTR2B/HTR4/LEPR/LPAR4/MAS1/MCHR1/NPY1R/NPY5R/P2RX1/PRL/PRLHR/PRLR/PTGER2/PTGER3/PTGFR/PTH1R/S1PR1/S1PR2/S1PR3/STR3/TACR1/TACR2/TBXA2R/THRA/VIPR2                                                                                                                                |
| hsa04020 | Calcium signaling pathway                  | 37/466     | 0.0000  | 0.0000  | ADCY4/ADRA1A/ADRA1D/ADRB3/AGTR1/ATP2B4/AVPR1A/CACNA1C/CACNA1G/CACNA1H/CAMK2A/CHRM2/EDNRA/EDNRB/GNA14/HTR2A/HTR2B/HTR4/ITPKB/ITPR1/MYLK/NOS3/P2RX1/PDE1A/PDE1B/PDE1C/PDGFRA/PDGFRB/PLN/PRKCA/PTGER3/PTGFR/RYR3/SLC8A1/TACR1/TACR2/TBXA2R                                                                                   |
| hsa04022 | cGMP-PKG signaling pathway                 | 34/466     | 0.0000  | 0.0000  | ADCY4/ADCY5/ADRA1A/ADRA1D/ADRA2A/ADRA2C/ADRB3/AGTR1/AKT3/ATP1A2/ATP1B2/ATP2B4/CACNA1C/EDNRA/EDNRB/GUCY1A2/ITPR1/KCNJ8/KCNMA1/KCNMB1/KCNMB2/MEF2C/MRV11/MYL9/MYLK/NFATC4/NOS3/NPR1/NPR2/PDE2A/PLN/PRKG1/RGS2                                                                                                               |

|          |                                                        |        |        |        |                                                                                                                                                                                                                                                                                                 |
|----------|--------------------------------------------------------|--------|--------|--------|-------------------------------------------------------------------------------------------------------------------------------------------------------------------------------------------------------------------------------------------------------------------------------------------------|
|          |                                                        |        |        |        | /SLC8A1                                                                                                                                                                                                                                                                                         |
| hsa04151 | PI3K-Akt signaling pathway                             | 51/466 | 0.0000 | 0.0000 | AKT3/ANGPT1/ANGPT4/BCL2/CHAD/CHRM2/COL1A2/COL4A6/COL6A1/COL6A2/COL6A3/COL6A6/EPO/FGF10/FGF13/FGF2/FGF7/FGFR1/FLT1/FLT4/GH1/GNG11/GNG7/HGF/ITGA11/ITGA7/ITGA8/ITGA9/ITGB3/KDR/LAMA2/LAMA4/LAMB2/LPAR4/NGF/NOS3/NR4A1/PDGFC/PDGFD/PDGFRA/PDGFRB/PRKCA/PRL/PRLR/RELN/TEK/THBS1/THBS4/TNXB/FIGF/VWF |
| hsa04512 | ECM-receptor interaction                               | 20/466 | 0.0000 | 0.0000 | CHAD/COL1A2/COL4A6/COL6A1/COL6A2/COL6A3/COL6A6/ITGA11/ITGA7/ITGA8/ITGA9/ITGB3/LAMA2/LAMA4/LAMB2/RELN/THBS1/THBS4/TNXB/VWF                                                                                                                                                                       |
| hsa05414 | Dilated cardiomyopathy                                 | 20/466 | 0.0000 | 0.0000 | ACTC1/ADCY4/ADCY5/CACNA1C/CACNB2/DES/DMD/ITGA11/ITGA7/ITGA8/ITGA9/ITGB3/LAMA2/MYL3/PLN/SGCA/SGCD/SLC8A1/TPM1/TPM2                                                                                                                                                                               |
| hsa04924 | Renin secretion                                        | 16/466 | 0.0000 | 0.0001 | ADCY5/ADCYAP1/ADCYAP1R1/ADRB3/AGTR1/AQP1/CACNA1C/EDNRA/GUCY1A2/ITPR1/KCNMA1/NPR1/PDE1A/PDE1B/PDE1C/PTGER2                                                                                                                                                                                       |
| hsa04261 | Adrenergic signaling in cardiomyocytes                 | 26/466 | 0.0000 | 0.0001 | ACTC1/ADCY4/ADCY5/ADRA1A/ADRA1D/AGTR1/AGTR2/AKT3/ATP1A2/ATP1B2/ATP2B4/BCL2/CACNA1C/CACNB2/CAMK2A/MYL3/PLN/PPP1R1A/PRKCA/RAPGEF4/SCN1B/SCN4B/SCN7A/SLC8A1/TPM1/TPM2                                                                                                                              |
| hsa04911 | Insulin secretion                                      | 18/466 | 0.0000 | 0.0001 | ABCC8/ADCY4/ADCY5/ADCYAP1/ADCYAP1R1/ATP1A2/ATP1B2/CACNA1C/CAMK2A/KCNMA1/KCNMB1/KCNMB2/KCNN2/KCNN3/PRKCA/RAPGEF4/SNAP25/VAMP2                                                                                                                                                                    |
| hsa05410 | Hypertrophic cardiomyopathy (HCM)                      | 17/466 | 0.0000 | 0.0003 | ACTC1/CACNA1C/CACNB2/DES/DMD/ITGA11/ITGA7/ITGA8/ITGA9/ITGB3/LAMA2/MYL3/SGCA/SGCD/SLC8A1/TPM1/TPM2                                                                                                                                                                                               |
| hsa05412 | Arrhythmogenic right ventricular cardiomyopathy (ARVC) | 15/466 | 0.0000 | 0.0007 | ACTN2/CACNA1C/CACNB2/CTNNA3/DES/DMD/ITGA11/ITGA7/ITGA8/ITGA9/ITGB3/LAMA2/SGCA/SGCD/SLC8A1                                                                                                                                                                                                       |



|          |                                   |        |        |        |                                                                                                                                                                                                                                                                       |
|----------|-----------------------------------|--------|--------|--------|-----------------------------------------------------------------------------------------------------------------------------------------------------------------------------------------------------------------------------------------------------------------------|
| hsa05205 | Proteoglycans in cancer           | 29/466 | 0.0000 | 0.0007 | AKT3/ANK2/CAMK2A/CAV1/DCN/ESR1/FGF2/FGFR1/FLNA/FLNC/FZD4/HGF/HPSE2/HSPB2/IGF2/ITGB3/ITPR1/KDR/LUM/MMP2/PPP1R12B/PRKCA/SDC2/THBS1/TIMP3/TWIST1/TWIST2/WNT2/WNT9B                                                                                                       |
| hsa04015 | Rap1 signaling pathway            | 29/466 | 0.0001 | 0.0013 | ADCY4/ADCY5/AKT3/ANGPT1/ANGPT4/FGF10/FGF13/FGF2/FGF7/FGFR1/FLT1/FLT4/GNAO1/HGF/ITGB3/KDR/LPAR4/MAGI2/NGF/PDGFC/PDGFD/PDGFR/PDGFRB/PRKCA/RAPGEF4/RASGRP2/TEK/THBS1/FIGF                                                                                                |
| hsa04713 | Circadian entrainment             | 17/466 | 0.0001 | 0.0016 | ADCY4/ADCY5/ADCYAP1R1/CACNA1C/CACNA1G/CACNA1H/CAMK2A/GNAO1/GNG11/GNG7/GRIA2/GRIA3/GUCY1A2/ITPR1/PRKCA/PRKG1/RYR3                                                                                                                                                      |
| hsa04514 | Cell adhesion molecules (CAMs)    | 22/466 | 0.0001 | 0.0018 | CADM3/CD34/CDH5/CLDN5/CNTNAP1/ESAM/ICAM2/ITGA8/ITGA9/JAM2/JAM3/LRRC4B/MAG/NCAM1/NEGR1/NLGN3/NRXN2/NRXN3/PECAM1/PTPRM/SDC2/SELP                                                                                                                                        |
| hsa04970 | Salivary secretion                | 16/466 | 0.0002 | 0.0021 | ADCY4/ADCY5/ADRA1A/ADRA1D/ADRB3/ATP1A2/ATP1B2/ATP2B4/BST1/GUCY1A2/ITPR1/KCNMA1/PRKCA/PRKG1/RYR3/VAMP2                                                                                                                                                                 |
| hsa05200 | Pathways in cancer                | 44/466 | 0.0003 | 0.0030 | ADCY4/ADCY5/AGTR1/AKT3/AR/AXIN2/BCL2/COL4A6/CTNNA3/CXCL12/EDNRA/EDNRB/FGF10/FGF13/FGF2/FGF7/FGFR1/FOXO1/FZD4/GLI1/GNG11/GNG7/HGF/LAMA2/LAMA4/LAMB2/LPAR4/MAPK10/MITF/MMP2/PDGFR/PDGFRB/PRKCA/PTCH2/PTGER2/PTGER3/RASGRP2/RUNX1T1/STAT5B/TGFBR2/FIGF/WNT2/WNT9B/ZBTB16 |
| hsa04072 | Phospholipase D signaling pathway | 21/466 | 0.0004 | 0.0036 | ADCY4/ADCY5/AGTR1/AKT3/AVPR1A/AVPR2/DGKB/FYN/GAB2/GRM7/LPAR4/MS4A2/PDGFC/PDGFD/PDGFR/PDGFRB/PPAP2A/PPAP2B/PRKCA/PTGFR/RAPGEF4                                                                                                                                         |
| hsa04014 | Ras signaling pathway             | 29/466 | 0.0004 | 0.0036 | AKT3/ANGPT1/ANGPT4/FGF10/FGF13/FGF2/FGF7/FGFR1/FLT1/FLT4/GAB2/GNG11/GNG7/HGF/KDR/MAPK10/NGF/PDGFC/PDGFD/PDGFR/PDGFRB/PLA2G5/PRKCA/RASA4/RASA4B/RASGRF2/                                                                                                               |

|          |                                                      |        |        |        |                                                                                                                                                                                                                                                                  |
|----------|------------------------------------------------------|--------|--------|--------|------------------------------------------------------------------------------------------------------------------------------------------------------------------------------------------------------------------------------------------------------------------|
| hsa04614 | Renin-angiotensin system                             | 7/466  | 0.0004 | 0.0042 | RASGRP2/TEK/FIGF<br>AGTR1/AGTR2/CMA1/CPA3/CTSG/ENPEP/MAS1<br>ADCY4/ADCY5/ADCYAP1R1/AKT3/ATP1A2/ATP1B2/ATP2B4/CACNA1C/CAMK2A/CHRM2/EDNRA/FXYD1/GLI1/GRIA2/GRIA3/HTR1E/HTR4/MAPK10/MYL9/NPR1/NPY1R/PLN/PTGER2/PTGER3/RAPGEF4/VIPR2<br>ABCA10/ABCA6/ABCA8/ABCA9/ABC |
| hsa04024 | cAMP signaling pathway                               | 26/466 | 0.0005 | 0.0042 | B1/ABCB5/ABCC8/ABCC9/ABCD2/ABCG2<br>AKT3/FGF10/FGF13/FGF2/FGF7/FGFR1                                                                                                                                                                                             |
| hsa02010 | ABC transporters                                     | 10/466 | 0.0005 | 0.0042 | /HGF/MITF/PDGFC/PDGFD/PDGFRAP/DGFRB                                                                                                                                                                                                                              |
| hsa05218 | Melanoma                                             | 12/466 | 0.0018 | 0.0153 |                                                                                                                                                                                                                                                                  |
| hsa04933 | AGE-RAGE signaling pathway in diabetic complications | 15/466 | 0.0020 | 0.0163 | AGTR1/AKT3/BCL2/COL1A2/COL3A1/COL4A6/EGR1/FOXO1/MAPK10/MMP2/NOS3/PRKCA/STAT5B/TGFBR2/FIGF                                                                                                                                                                        |
| hsa04925 | Aldosterone synthesis and secretion                  | 13/466 | 0.0022 | 0.0169 | ADCY4/ADCY5/AGTR1/CACNA1C/CACNA1G/CACNA1H/CAMK1/CAMK2A/ITPR1/NPR1/NR4A1/PDE2A/PRKCA                                                                                                                                                                              |
| hsa04724 | Glutamatergic synapse                                | 16/466 | 0.0026 | 0.0197 | ADCY4/ADCY5/CACNA1C/DLG4/GNAO1/GNG11/GNG7/GRIA2/GRIA3/GRIK5/GRM7/ITPR1/PRKCA/SHANK3/SLC1A7/TRPC1                                                                                                                                                                 |

**Table S5 Up-regulated GSEA pathways**

| NAME                                          | Size | ES     | NES    | NOM p-value | FDR q-value |
|-----------------------------------------------|------|--------|--------|-------------|-------------|
| KEGG_ DNA replication                         | 36   | 0.8605 | 3.1050 | 0.0000      | 0.0000      |
| KEGG_ Cell cycle                              | 124  | 0.6606 | 3.0257 | 0.0000      | 0.0000      |
| KEGG_ Base excision repair                    | 35   | 0.7141 | 2.5420 | 0.0000      | 0.0000      |
| KEGG_ Mismatch repair                         | 23   | 0.7528 | 2.3964 | 0.0000      | 0.0000      |
| KEGG_ Systemic lupus erythematosus            | 109  | 0.5416 | 2.3960 | 0.0000      | 0.0000      |
| KEGG_ Homologous recombination                | 27   | 0.7291 | 2.3908 | 0.0000      | 0.0000      |
| KEGG_ Nucleotide excision repair              | 44   | 0.6368 | 2.3785 | 0.0000      | 0.0000      |
| KEGG_ P53 signalling pathway                  | 66   | 0.5705 | 2.2898 | 0.0000      | 0.0000      |
| KEGG_ Proteasome                              | 43   | 0.6214 | 2.2817 | 0.0000      | 0.0000      |
| KEGG_ Spliceosome                             | 123  | 0.4627 | 2.0906 | 0.0000      | 0.0004      |
| KEGG_ Pyrimidine metabolism                   | 93   | 0.4729 | 2.0471 | 0.0000      | 0.0006      |
| KEGG_ Aminoacyl TRNA biosynthesis             | 41   | 0.5508 | 2.0251 | 0.0000      | 0.0006      |
| KEGG_ Steroid biosynthesis                    | 16   | 0.6876 | 1.9574 | 0.0000      | 0.0017      |
| KEGG_ One carbon pool by folate               | 17   | 0.6671 | 1.9326 | 0.0000      | 0.0025      |
| KEGG_ Oocyte meiosis                          | 107  | 0.4266 | 1.8932 | 0.0000      | 0.0041      |
| KEGG_ Progesterone mediated oocyte maturation | 83   | 0.4359 | 1.8765 | 0.0000      | 0.0045      |
| KEGG_ Antigen processing and presentation     | 50   | 0.4820 | 1.8220 | 0.0024      | 0.0073      |
| KEGG_ Glycolysis gluconeogenesis              | 57   | 0.4505 | 1.7825 | 0.0000      | 0.0112      |
| KEGG_ Primary immunodeficiency                | 35   | 0.5102 | 1.7760 | 0.0044      | 0.0115      |
| KEGG_ Non-homologous end joining              | 12   | 0.6760 | 1.7697 | 0.0084      | 0.0118      |
| KEGG_ RNA degradation                         | 55   | 0.4491 | 1.7403 | 0.0000      | 0.0154      |
| KEGG_ Cytosolic DNA sensing pathway           | 42   | 0.4678 | 1.7170 | 0.0047      | 0.0185      |
| KEGG_ Bladder cancer                          | 40   | 0.4490 | 1.6409 | 0.0046      | 0.0357      |
| KEGG_ Folate biosynthesis                     | 11   | 0.6127 | 1.5703 | 0.0314      | 0.0631      |

**Table S6 Down-regulated GSEA pathways**

| NAME                                                         | Size | ES      | NES     | NOM p-value | FDR q-value |
|--------------------------------------------------------------|------|---------|---------|-------------|-------------|
| KEGG_ Ribosome                                               | 87   | -0.6146 | -2.4324 | 0.0000      | 0.0000      |
| KEGG_ Vascular smooth muscle contraction                     | 112  | -0.5767 | -2.4139 | 0.0000      | 0.0000      |
| KEGG_ Focal adhesion                                         | 196  | -0.4470 | -2.0197 | 0.0000      | 0.0038      |
| KEGG_ Neuroactive ligand-receptor interaction                | 240  | -0.4275 | -1.9753 | 0.0000      | 0.0054      |
| KEGG_ Calcium signalling pathway                             | 169  | -0.4386 | -1.9248 | 0.0000      | 0.0070      |
| KEGG_ Cell adhesion molecules (CAMs)                         | 109  | -0.4646 | -1.9331 | 0.0000      | 0.0074      |
| KEGG_ TGF- $\beta$ signalling pathway                        | 85   | -0.4575 | -1.8121 | 0.0000      | 0.0193      |
| KEGG_ Dilated cardiomyopathy                                 | 87   | -0.4580 | -1.8185 | 0.0000      | 0.0203      |
| KEGG_ Hypertrophic cardiomyopathy (HCM)                      | 81   | -0.4433 | -1.7179 | 0.0017      | 0.0451      |
| KEGG_ MAPK signalling pathway                                | 256  | -0.3608 | -1.6794 | 0.0000      | 0.0581      |
| KEGG_ ECM-receptor interaction                               | 83   | -0.4174 | -1.6421 | 0.0000      | 0.0726      |
| KEGG_ Gap junction                                           | 89   | -0.4106 | -1.6290 | 0.0032      | 0.0764      |
| KEGG_ Complement and coagulation cascades                    | 67   | -0.4223 | -1.5935 | 0.0085      | 0.0874      |
| KEGG_ Glycophingolipid biosynthesis ganglio series           | 15   | -0.5868 | -1.6005 | 0.0251      | 0.0887      |
| KEGG_ ABC transporters                                       | 43   | -0.4525 | -1.5815 | 0.0139      | 0.0899      |
| KEGG_ Arrhythmogenic right ventricular cardiomyopathy (ARVC) | 72   | -0.4034 | -1.5508 | 0.0081      | 0.1067      |

**Table S7 KEGG pathway analysis of PPI modules**

| Term                                              | Count | P-value | Genes                                                                                                                                                                                             |
|---------------------------------------------------|-------|---------|---------------------------------------------------------------------------------------------------------------------------------------------------------------------------------------------------|
| hsa04080: Neuroactive ligand-receptor interaction | 17    | 0.0000  | MCHR1, PTGER3, NPBWR1, LPAR3, NPY1R, NPY5R, S1PR2, S1PR3, S1PR1, SSTR3, CHRM2, SSTR1, CNR1, GRM7, GALR2, S1PR5, ADRA2C, HIST1H3J, HIST1H4L, HIST1H2BD, HIST1H2AG, HIST1H2AD, HIST1H2BH, HIST2H4A, |
| hsa05322: Systemic lupus erythematosus            | 11    | 0.0000  | HIST1H2BO, HIST1H2BM, HIST1H4B, HIST1H2BL, HIST1H2BJ, HIST1H2AI, HIST1H3C, HIST1H2AJ, HIST3H2BB, HIST1H3F, HIST1H2AL                                                                              |
| hsa04512: ECM-receptor interaction                | 10    | 0.0000  | LAMA2, LAMB3, LAMB2, LAMC3, COL6A3, ITGB6, COL6A2, COL6A1, LAMC2, CHAD                                                                                                                            |
| hsa04510: Focal adhesion                          | 10    | 0.0000  | LAMA2, LAMB3, LAMB2, LAMC3, COL6A3, ITGB6, COL6A2, COL6A1, LAMC2, CHAD                                                                                                                            |
| hsa04110: Cell cycle                              | 9     | 0.0000  | CCNE2, CDC6, CDC45, MCM7, TP53, PKMYT1, TTK, CDK6, MCM5                                                                                                                                           |
| hsa04062: Chemokine signaling pathway             | 8     | 0.0000  | ADCY4, ADCY7, CXCL5, CCR1, ADCY5, CXCR3, CCL16, CXCL10                                                                                                                                            |
| hsa04114: Oocyte meiosis                          | 6     | 0.0002  | ADCY4, ADCY7, ADCY5, SGOL1, CDC20, ESPL1                                                                                                                                                          |
| hsa05200: Pathways in cancer                      | 6     | 0.0139  | LAMA2, E2F2, LAMB3, LAMB2, LAMC3, LAMC2                                                                                                                                                           |
| hsa04060: Cytokine-cytokine receptor interaction  | 5     | 0.0475  | CXCL5, CCR1, CXCR3, CCL16, CXCL10                                                                                                                                                                 |
| hsa04020: Calcium signaling pathway               | 4     | 0.0349  | ADCY4, PTGER3, ADCY7, CHRM2                                                                                                                                                                       |
| hsa04270: Vascular smooth muscle contraction      | 4     | 0.0056  | EDNRA, AVPR1A, ADRA1B, ADRA1D                                                                                                                                                                     |
| hsa04115: p53 signaling pathway                   | 4     | 0.0079  | CCNE2, RRM2, TP53, CDK6                                                                                                                                                                           |
| hsa00230: Purine metabolism                       | 4     | 0.0350  | PDE7B, PDE2A, RRM2, PDE11A                                                                                                                                                                        |
| hsa04914: Progesterone-mediated oocyte maturation | 3     | 0.0356  | ADCY4, ADCY7, ADCY5                                                                                                                                                                               |
| hsa04540: Gap junction                            | 3     | 0.0402  | ADCY4, ADCY7, ADCY5                                                                                                                                                                               |
| hsa05414: Dilated cardiomyopathy                  | 3     | 0.0449  | ADCY4, ADCY7, ADCY5                                                                                                                                                                               |

### Supplementary Figure S1:

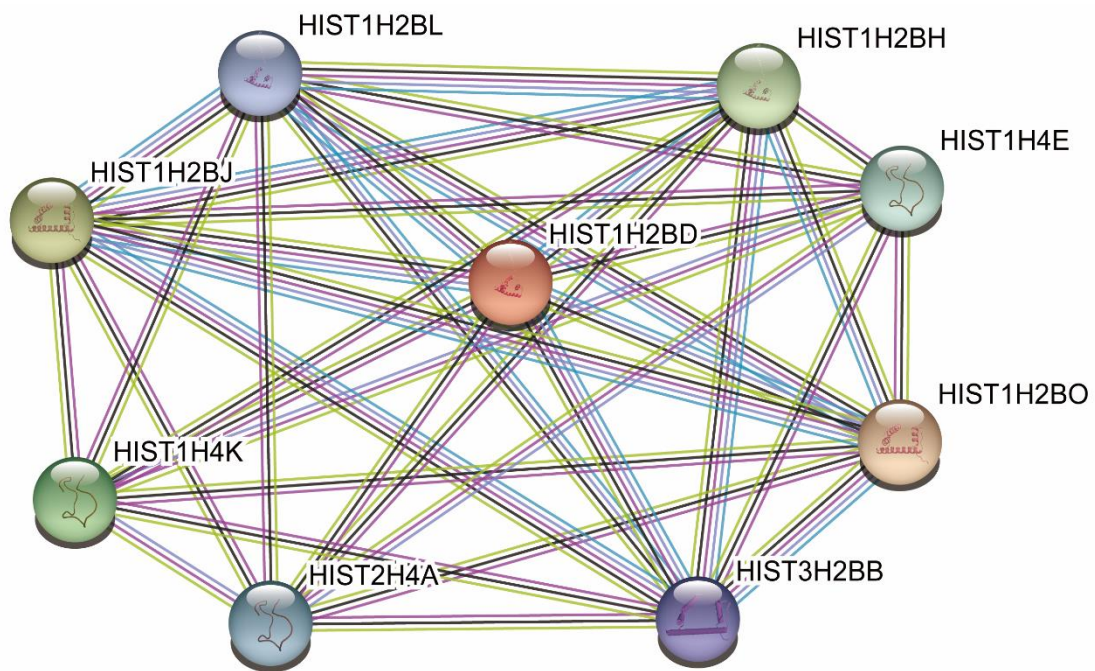

Supplementary Figure 1

Protein-PPI network analysis of histone genes enriched in the SLE pathway. Each circle represents a node and each line represents an edge. The different color of the lines represents different types of interactions: light blue: curated databases; pink: experimentally determined; green: gene neighborhood; red: gene fusions; blue: gene co-occurrence; yellow: textmining; dark: co-expression; grey: protein homology.
